# Supplementary material for: Comparative Phytochemical Analysis of Syzygium formosum (Wall.) Masam Leaf and Its Biological Activities
Source: MDPI journal article supplement (doi:10.3390/app112210552), 2021-11-09
Supplement: s1 [file s1]

## SUPPLEMENTARY MATERIALS

**Table S1.** The MRM parameters and MS/MS transitions for analysis of phenolic compounds and triterpenoids

| <b>Compounds</b>      | <b>Retention time (min)</b> | <b>Precursor ion (m/z)</b> | <b>Product ion (m/z)</b> | <b>Fragmentor (V)</b> | <b>Collision energy (V)</b> |
|-----------------------|-----------------------------|----------------------------|--------------------------|-----------------------|-----------------------------|
| Catechin              | 1.52                        | 291.1                      | 139                      | 90                    | 7                           |
| EGCG                  | 2.46                        | 459.0                      | 139                      | 90                    | 18                          |
| Myricetin glucoside   | 4.06                        | 481.1                      | 319                      | 90                    | 7                           |
| Myricetin rhamnoside  | 5.49                        | 465.1                      | 319                      | 80                    | 5                           |
| Quercetin glucoside   | 6.02                        | 465.1                      | 303                      | 100                   | 7                           |
| Quercetin arabinoside | 6.79                        | 435.1                      | 303                      | 90                    | 2                           |
| Quercetin rhamnoside  | 6.97                        | 449.0                      | 303                      | 80                    | 5                           |
| Quercetin             | 8.30                        | 303.1                      | 153                      | 170                   | 30                          |
| Gallic acid           | 1.15                        | 168.9                      | 125                      | 90                    | 10                          |
| 3,4-DHBA              | 1.77                        | 153.0                      | 109                      | 80                    | 10                          |
| p-coumaric acid       | 5.57                        | 162.9                      | 119                      | 85                    | 10                          |
| Madecassic acid       | 3.68                        | 469.3                      | 189.1                    | 140                   | 27                          |
| Asiatic acid          | 4.61                        | 453.3                      | 201.1                    | 130                   | 25                          |
| Hederagenin           | 7.08                        | 455.3                      | 189.1                    | 120                   | 25                          |
| Maslinic acid         | 8.53                        | 455.3                      | 203.1                    | 120                   | 25                          |
| Corosolic acid        | 8.93                        | 455.3                      | 205.1                    | 120                   | 20                          |
| Betulin               | 11.71                       | 425.3                      | 191.1                    | 130                   | 25                          |
| Betulinic acid        | 12.66                       | 439.3                      | 137.1                    | 130                   | 25                          |
| Oleanolic acid        | 13.67                       | 439.3                      | 203.1                    | 130                   | 25                          |
| Ursolic acid          | 13.98                       | 439.3                      | 203.1                    | 130                   | 25                          |

**Table S2.** Regression equations and coefficients, linear ranges, limit of detection, limit of quantification, and recovery of the analytes

| Analyte               | Regression equation  | R <sup>2</sup> | Range (mg/L) | LOD (µg/L) | LOQ (µg/L) | Average recovery (%) |
|-----------------------|----------------------|----------------|--------------|------------|------------|----------------------|
| Catechin              | $y = 34.5x - 694$    | 0.9987         | 0.05-5.0     | 1.5        | 4.5        | 102.1 ± 8.1          |
| EGCG                  | $y = 27.0x - 4010$   | 0.9961         | 0.01-0.5     | 3.5        | 10.5       | 104.0 ± 7.5          |
| Myricetin glucoside   | $y = 70.6x - 5540$   | 0.9973         | 0.01-0.5     | 2.0        | 6.0        | 105.0 ± 8.2          |
| Myricetin rhamnoside  | $y = 52.6x - 1609$   | 0.9981         | 0.25-5.0     | 2.0        | 6.0        | 100.5 ± 6.2          |
| Quercetin glucoside   | $y = 71.3x - 140$    | 0.9997         | 0.01-0.5     | 1.5        | 4.5        | 106.7 ± 7.4          |
| Quercetin arabinoside | $y = 59.5x + 2056$   | 0.9992         | 0.1-2.5      | 2.0        | 6.0        | 104.4 ± 3.8          |
| Quercetin rhamnoside  | $y = 42.8x - 2243$   | 0.9988         | 0.1-0.5      | 1.5        | 4.5        | 102.9 ± 7.4          |
| Quercetin             | $y = 3.0x - 208$     | 0.9973         | 0.1-0.5      | 5.0        | 15.0       | 79.0 ± 8.0           |
| Gallic acid           | $y = 25.3x - 337$    | 0.9992         | 0.05-5.0     | 10.0       | 30.0       | 79.2 ± 7.2           |
| 3,4-DHBA              | $y = 29.9x + 2$      | 0.9970         | 0.05-1.0     | 2.0        | 6.0        | 102.1 ± 8.0          |
| p-coumaric acid       | $y = 147.3x + 3610$  | 0.9957         | 0.05-1.0     | 1.0        | 3.0        | 101.5 ± 7.1          |
| Madecassic acid       | $y = 88.2x + 70$     | 0.9995         | 0.01-0.2     | 1.5        | 4.5        | 84.0 ± 4.0           |
| Asiatic acid          | $y = 334.6x - 277.3$ | 0.9997         | 0.01-0.5     | 2.2        | 6.6        | 102.3 ± 1.5          |
| Hederagenin           | $y = 612.4x - 1418$  | 0.9996         | 0.01-0.5     | 0.8        | 2.4        | 98.7 ± 3.5           |
| Maslinic acid         | $y = 283.2x + 476.7$ | 0.9998         | 0.01-0.5     | 1.4        | 4.2        | 99.3 ± 1.7           |
| Corosolic acid        | $y = 681.3x - 1896$  | 0.9997         | 0.01-0.5     | 2.8        | 8.4        | 101.0 ± 1.7          |
| Betulin               | $y = 47.32x - 230.7$ | 0.9986         | 0.01-0.5     | 1.1        | 3.3        | 102.1 ± 2.2          |
| Betulinic acid        | $y = 13.3x + 237$    | 0.9948         | 0.1-1.0      | 9.1        | 27.3       | 101.3 ± 2.1          |
| Oleanolic acid        | $y = 758.8x - 2795$  | 0.9991         | 0.01-1.0     | 1.4        | 4.2        | 100.0 ± 2.6          |
| Ursolic acid          | $y = 729.9x - 3648$  | 0.9989         | 0.01-1.0     | 1.3        | 3.9        | 99.7 ± 3.1           |

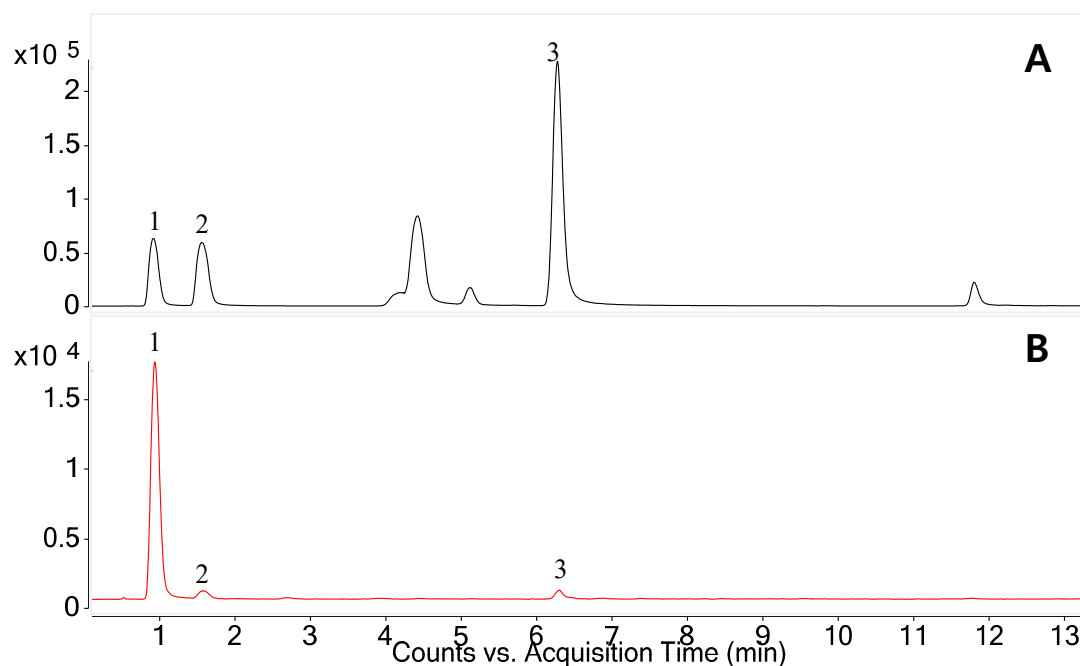

**Figure S1.** The MRM chromatogram of detected phenolic acids in *Syzygium formosum* leaves (A: Mixed standard, B: Sample; 1- Gallic acid, 2-3,4-dihydrobenzoic acid, 3-*p*-coumaric acid)

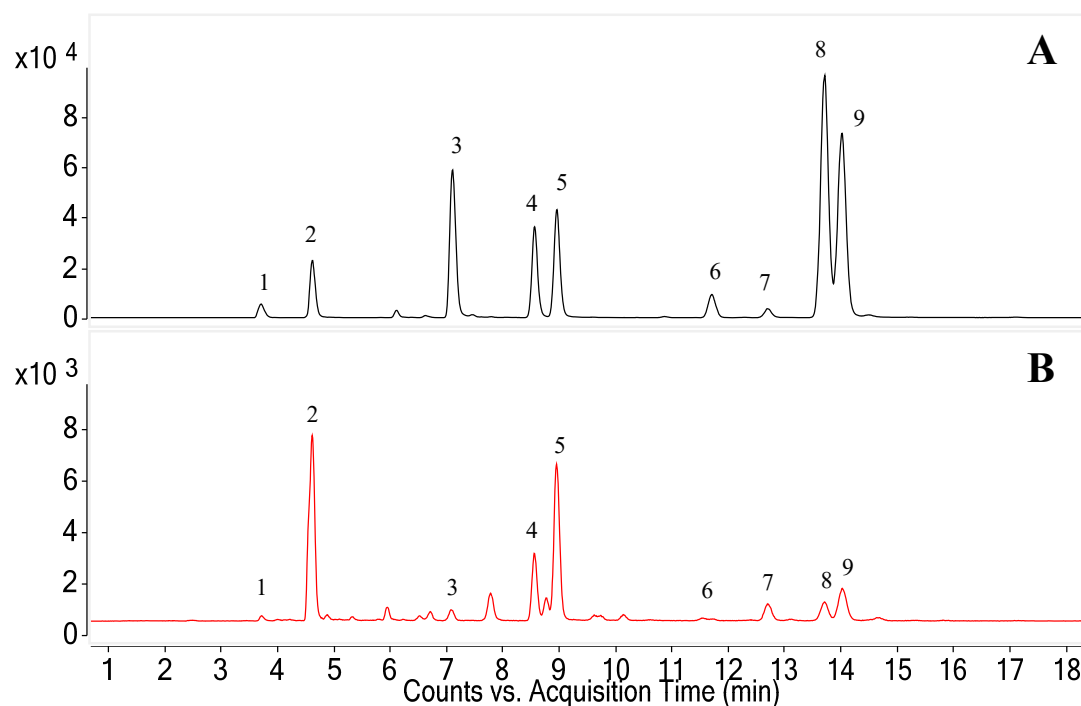

**Figure S2.** The MRM chromatogram of detected triterpenoids in *Syzygium formosum* leaves (A: Mixed standard, B: Sample; 1- Madecassic acid, 2- Asiatic acid, 3- Hederagenin, 4- Maslinic acid, 5- Corosolic acid, 6- Betulin, 7- Betulinic acid, 8- Oleanolic acid, 9- Ursolic acid)

A)

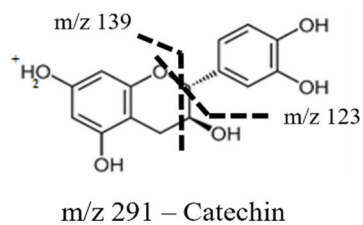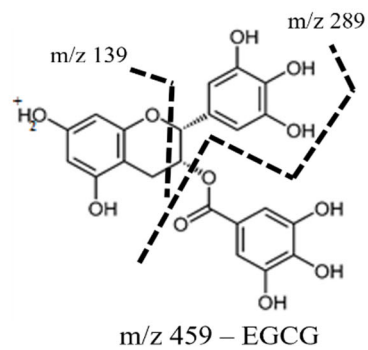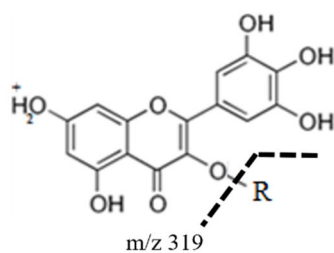

m/z 465 (R- Rha) – Myricetin rhamnoside

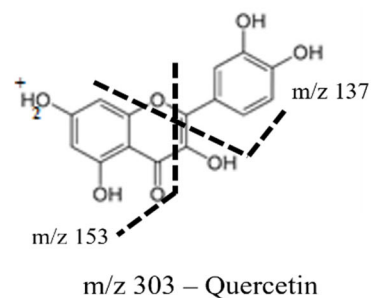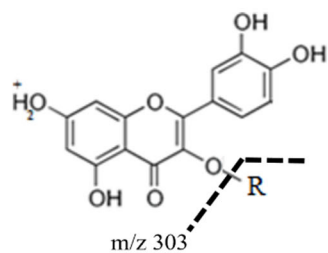

m/z 435 (R- Ara) – Quercetin arabinoside  
m/z 449 (R- Rha) – Quercetin rhamnoside

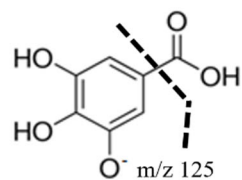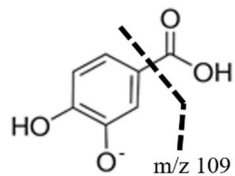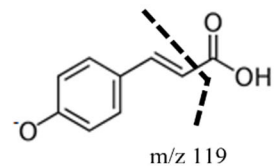

B)

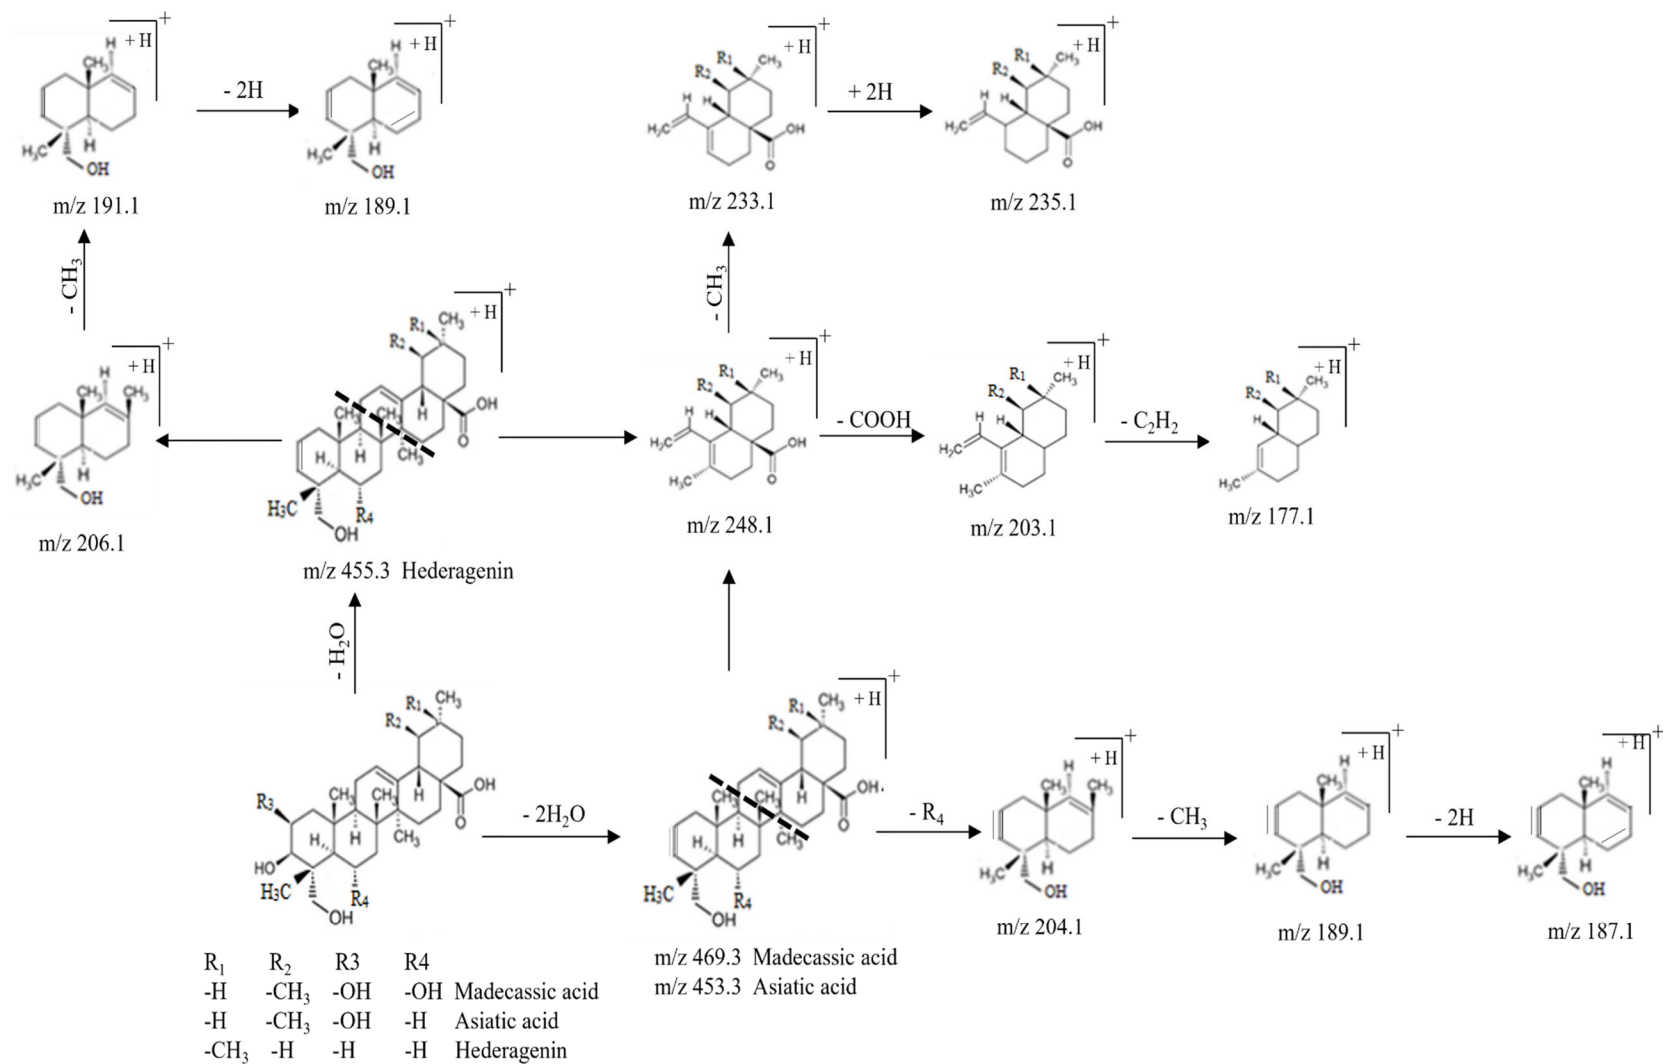

Figure S3. (Continued)

C)

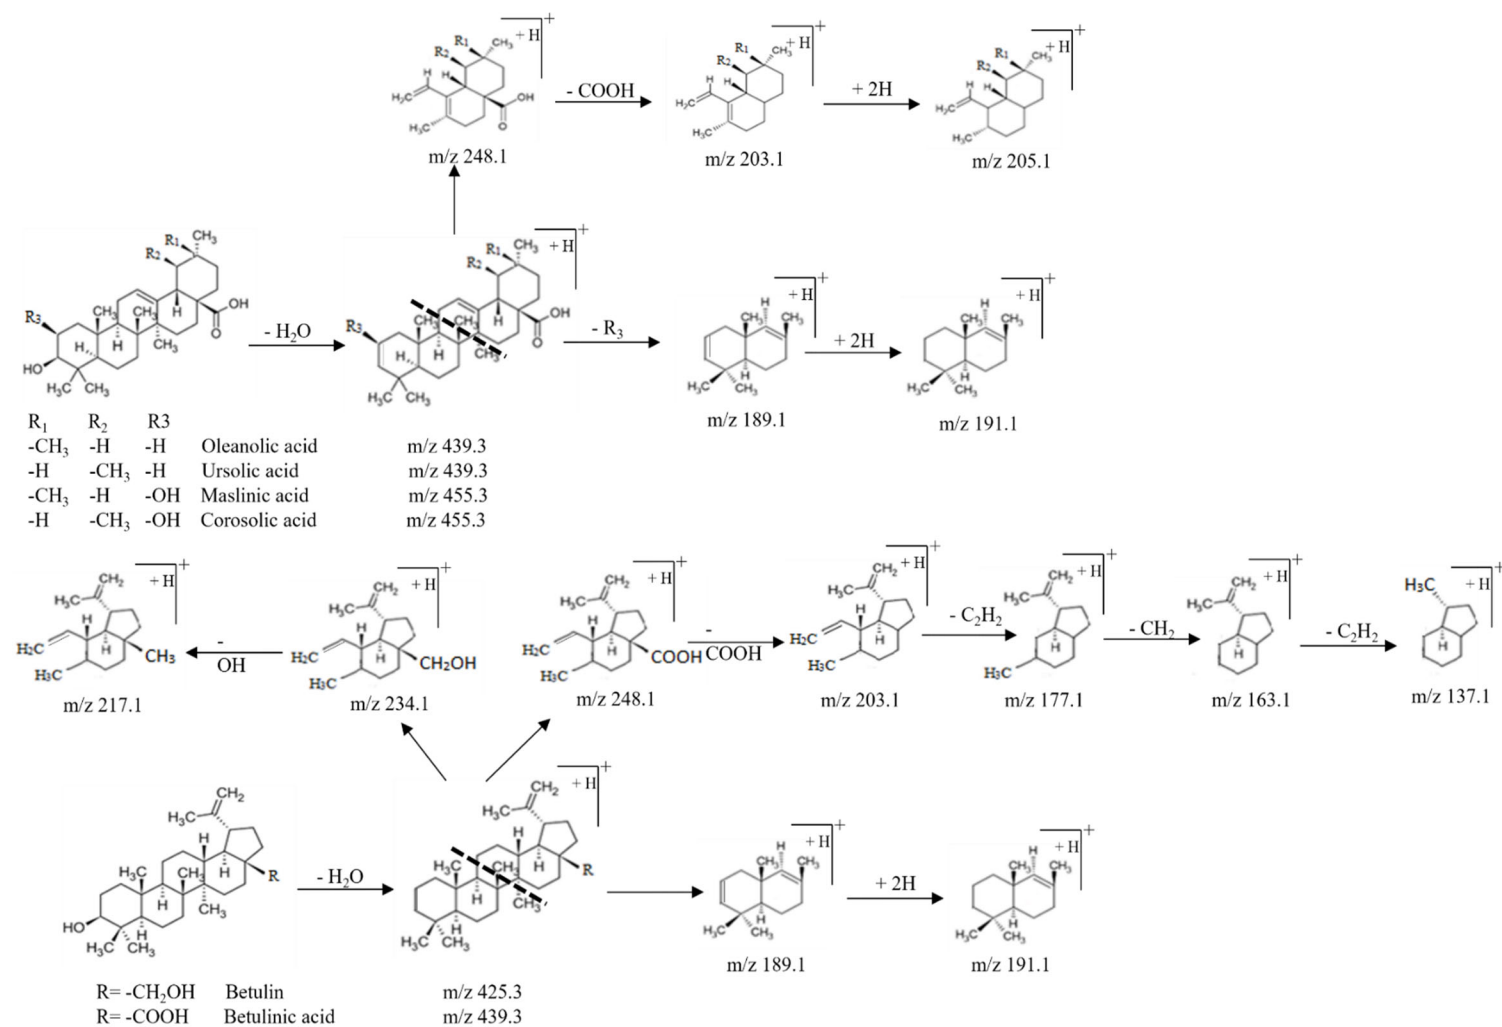

Figure S3. (Continued)

Figure S3. Proposed fragmentation of phenolic compounds (A) and triterpenoids (B and C) in *Syzygium formosum* leaves
